# Supplementary material
Source: MDPI journal article supplement (https://www.mdpi.com/2306-5729/8/11/159)
Supplement: s1 [file s1]

Archive with 5 entries (5 files):
- Data S1 Manual curation of questions in DFG and Horizon Europe questionnaires.csv
- Document S1 Expanded description of the tool functions and analysis.pdf
- Document S2 Example DataPLAN DMP output of a H2020 project.pdf
- Document S3 Example DataPLAN DMP output of a Horizon Europe project.pdf
- Document S4 Example DataPLAN DMP output of a DFG project.pdf
