# Supplementary material
Source: MDPI journal article supplement (https://www.mdpi.com/2306-5729/8/11/159)
Supplement: s1 [file s1]

Data of different types or of different domains will be generated differently. For example:

- Short read sequencing will be either collected or outsourced and raw data will be received.
- Metabolomic data will be generated using chromatography coupled to mass spectrometry and from enzyme platforms mostly.
- Proteomic data will be generated using an EU platform which are in line with community standards.
- Image data will be generated by using equipment (cameras, scanners, and microscopes) or software. Original images which contain metadata such as exif photo information will be archived.
- Genomic data will be created from sequencing data. The sequencing data will be collected by Next Generation Sequencing (NGS) equipment. Then the sequencing data will be processed to get the genomic data.
- Genetic data will be generated by using Next Generation Sequencing (NGS) equipment.
- Targeted assays (e.g. glucose and fructose content) will be generated using specific equipment or experiments. The procedure is fully documented in the lab book.
- Models data will be generated by software simulations. The complete workflow, which includes the environment, runtime, parameter and results will be documented and achieved.
- The code data will be generated by programmers.
- The cloned DNA data will be generated by using a sequencing tool.
- Phenotypic data will be generated using phenotyping platforms.

The Example Project has the following aim: Example Aim . Therefore, data collection, integration and visualization using the DataPLANT ARC structure are absolutely necessary because the data are used not only to understand principles, but also be informed about the provenance of data analyzing data. Stakeholders must also be informed about the provenance of data. It is therefore necessary to ensure that the data are well generated and also well annotated with metadata using open standards, as laid out in the next section.

Public data will be extracted as described in paragraph 1.3. For the Example Project , specific data sets will be generated by the consortium partners.

### 1.3 Is existing data reused?

The project builds on existing data sets and relies on them. For instance, without a proper genomic reference it is very difficult to analyze NGS data sets. It is also important to include existing data sets on the expression and metabolic behaviour of Example Topic , but of course, also on existing characterization and the background knowledge. Genomic references can simply be gathered from reference databases for genomes/sequences, like the National Center for Biotechnology Information: NCBI (US); European Bioinformatics Institute: EBI (EU); DNA Data Bank of Japan: DDBJ (JP). Furthermore, prior 'unstructured' data in the form of publications and data contained therein will be used for decision making.

### 1.4 Which data types (in terms of data formats like image data, text data or measurement data) arise in your project and in what way are they further processed?

We foresee that the following data about Example Topic will be collected and generated at the very least: phenotypes, genotypes, other NGS data, metabolome, RNA-Seq and other forms of transcriptomic data, image datasets, proteome, targeted assays (e.g. glucose and fructose content), model outputs, computational code, cloned DNA and result data. Furthermore, data derived from the original raw data sets will also be collected. This is important, as different analytical pipelines might yield different results or include ad-hoc data analysis parts and these pipelines will be tracked in the DataPLANT ARC. Therefore, specific care will be taken, to document and archive these resources (including the analytic pipelines) as well relying on the vast expertise in the DataPLANT consortium .

### 1.5 To what extent do these arise or what is the anticipated data volume?

We expect to generate raw data in the range of ??? GB of data. The size of the derived data will be about ??? GB.

## 2. Documentation and data quality

### 2.1. What approaches are being taken to describe the data in a comprehensible manner (such as the use of available metadata, documentation standards or ontologies)?

As noted above, we foresee using minimal standards such as MinSEQe for sequencing data and Metabolights compatible forms for metabolites and MIAPPE for phenotyping-like data . The minimal information standards will allow the integration of data across projects, and its reuse according to established and tested protocols. Specialized repositories will be used for common data types. For unstructured and less standardized data (e.g., experimental phenotypic measurements), these will be annotated with metadata and if complete allocated a digital object identifier (DOI). The Whole datasets will also be wrapped into an ARC with allocated DOIs.. Whenever possible, data will be stored in common and openly defined formats including all the necessary metadata to interpret and analyze data in a biological context. By default, no proprietary formats will be used. However Microsoft Excel files (according to ISO/IEC 29500-1:2016) might be used as intermediates by the consortium and by some ARC components. In addition, text files might be edited in text processor files, but will be shared as pdf.

We will use Investigation, Study, Assay (ISA) specification for metadata creation. For specific data (e.g., RNASeq or genomic data), we use metadata templates from the end-point repositories. The Minimum Information About a Next-generation Sequencing Experiment (MinSEQe) will also be used. Metabolights submission compliant standards will be used for metabolomic data where this is accepted by the consortium partners. As a part of plant research community, we use MIAPPE for phenotyping data in the broadest sense, but we will also be rely on specific SOPs for additional annotations that consider advanced DataPLANT annotation and ontologies.

#en Other standards are also adhered to.

Open ontologies will be used where they are mature. As stated above, some ontologies and controlled vocabularies might need to be extended. Here, the Example Project will build on the advanced ontologies developed in DataPLANT.

Keywords about the experiment and the general consortium will be included, as well as an abstract about the data, where useful. In addition, certain keywords can be auto-generated from dense metadata and its underlying ontologies. Here, DataPLANT strives to complement these with standardized DataPLANT ontologies that are supplemented where the ontology does not yet include the variables.

In fact, open biomedical ontologies will be used where they are mature. As stated in the previous question, sometimes ontologies and controlled vocabularies might have to be extended. Here, the Example Project will build on the advanced ontologies developed in DataPLANT.

## **2.2 What measures are being adopted to ensure high data quality?**

The Example Project aims at the following aim: Example Aim . Therefore, data collection, integration and visualization using the DataPLANT ARC structure are absolutely necessary because the data are used not only to understand principles, but also be informed about the provenance of data analyzing data. Stakeholders must also be informed about the provenance of data. It is therefore necessary to ensure that the data are well generated and also well annotated with metadata using open standards. Data variables will be allocated standard names. For example, genes, proteins and metabolites will be named according to approved nomenclature and conventions. These will also be linked to functional ontologies where possible. Datasets will also be named in a meaningful way to ensure readability by humans. Plant names will include traditional names, binomials, and all strain/cultivar/subspecies/variety identifiers.

To maintain data integrity and to be able to re-analyze data, data sets will get version numbers where this is useful (e.g. raw data must not be changed and will not get a version number and is considered immutable). this is automatically supported by the ARC Git DataPLANT infrastructure.

As mentioned above, we foresee using e.g. MinSEQe for sequencing data and Metabolights compatible forms for metabolites as well as MIAPPE for phenotyping-like data. The latter will thus allow the integration of data across projects and safeguards that reuse established and tested protocols. Additionally, we will use ontology terms to enrich the data sets relying on free and open ontologies. In addition, additional ontology terms might be created and be canonized during the Example Project .

## **2.3 Are quality controls in place and if so, how do they operate?**

The data will be checked and curated through the project period. Furthermore, data will be analyzed for quality control (QC) problems using automatic procedures as well as by manual curation. Phd students and lab professionals will be responsible for the first-hand quality control. Afterwards, the data will be checked and annotated by Example data officer name . FastQC will be conducted on the base-calling. #enBefore publication, the data will be controlled again.

## **2.4 Which digital methods and tools (e.g. software) are required to use the data?**

The Example Project will use common Research Data Management (RDM) tools and in particular resources developed by the NFDI of Germany.

No specialized software will be needed to access the data, usually just a modern browser. Access will be possible through web interfaces. For data processing after obtaining raw data, typical open-source software can be used. As no proprietary software is needed, no documentation needs to be provided.

However, DataPLANT resources are well described, and their setup is documented on their github project pages.

DataPLANT offers tools such as the open-source SWATE plugin for Excel, the ARC commander, and the DMP tool which will not necessarily make the interaction with data more convenient.

As stated above, here we use publicly available open-source and well-documented certified software .

### **3. Storage and technical archiving the project**

#### **3.1 How is the data to be stored and archived throughout the project duration?**

Wherever there are certified repositories, these will be used as end-point repositories. Transcriptomics data and gene sequence data will be also made available upon publication via the standards ENA/SRA, metabolite data in e.g. Metabolights (and/or Nationwide repositories like the German NFDI the French INRAe), Proteomics data in e.g. Pride/Proteomexchange . In addition, the national resource will maintain safekeeping of data also after the project ends. In addition, databases like e.g. Proteomexchange do not support deep plant-specific metadata; hence ARCs will be maintained to ensure reusability.

Data will be made available for many years and potentially indefinitely after the end of the project.

In any case data submitted to international discipline related repositories which use specialized technologies (as detailed above) e.g. ENA /Pride would be subject to local data storage regulation.

#### **3.2 What is in place to secure sensitive data throughout the project duration (access and usage rights)?**

In DataPLANT, data management relies on the Annotated Research Context (ARC). It is password protected, so before any data can be obtained or samples generated, an authentication needs to take place.

In case data is only shared within the consortium, if the data is not yet finished or under IP checks, the data is hosted internally, and the username and the password will be required (see also our GDPR rules). In the case data is made public under final EU or US repositories,

completely anonymous access is normally allowed. this is the case for ENA as well and both are in line with GDPR requirements.

There will be no restrictions once the data is made public.

## **4. Legal obligations and conditions**

### **4.1 What are the legal specifics associated with the handling of research data in your project?**

At the moment, we do not anticipate ethical or legal issues with data sharing. In terms of ethics, since this is plant data, there is no need for an ethics committee, however, diligence for plant resource benefit sharing is considered (□see Nagoya protocol).

The only personal data that will potentially be stored is the submitter name and affiliation in the metadata for data. In addition, personal data will be collected for dissemination and communication activities using specific methods and procedures developed by the Example Project partners to adhere to data protection.

### **4.2 Do you anticipate any implications or restrictions regarding subsequent publication or accessibility?**

Once data is transferred to the Example Project platform and ARCs have been generated in DataPLANT, data security will be imposed. This comprises secure storage, and the use of passwords and usernames is generally transferred via separate safe media.

### **4.3 What is in place to consider aspects of use and copyright law as well as ownership issues?**

Open licenses, such as Creative Commons (CC), will be used whenever possible.

### **4.4 Are there any significant research codes or professional standards to be taken into account?**

Whenever possible, data will be stored in common and openly defined formats including all the necessary metadata to interpret and analyze data in a biological context. By default, no proprietary formats will be used; however, Microsoft Excel files (according to ISO/IEC 29500-1:2016) might be used as intermediates by the consortium and by some ARC components in form. In addition, text files might be edited in text processor files, but will be shared as pdf.

## **5. Data exchange and long-term data accessibility**

### **5.1 Which data sets are especially suitable for use in other contexts?**

The data will be useful for the Example Project partners, the scientific community working on Example Topic or the general public interested in Example Topic . Hence, the Example Project also strives to collect the data that has been disseminated and potentially advertise it

e.g. through the DataPLANT platform or other means , if it is not included in a publication anyway, which is the most likely form of dissemination.

## **5.2 Which criteria are used to select research data to make it available for subsequent use by others?**

By default, all data sets from the Example Project will be shared with the community and made openly available. This is, however, after partners have had the ability to check for IP protection (according to agreements and background rights). However, all partners also strive for IP protection of data sets which will be tested and due diligence will be given.

Note that in multi-beneficiary projects it is also possible for specific beneficiaries to keep their data closed if relevant provisions are made in the consortium agreement and are in line with the reasons for opting out.

## **5.3 Are you planning to archive your data in a suitable infrastructure?**

As the Example Project is closely aligned with DataPLANT, the ARC converter and DataHUB will be used to find the end-point repositories and upload to the repositories automatically.

As noted above, specialized repositories like SRA /ENA, Pride /Proteomexchange are the most common ones and will be used when appropriate. In the case of unstructured less standardized data (e.g. experimental phenotypic measurements), these will be metadata annotated and if complete given a digital object identifier (DOI). and the whole data sets wrapped into an ARC will get DOIs as well.

The submission is for free, and it is the goal (at least of ENA) to obtain as much data as possible. Therefore, arrangements are neither necessary nor useful. Catch-all repositories are not required. For DataPLANT, this has been agreed upon.

## **5.4 If so, how and where? Are there any retention periods?**

There are no restrictions, beyond the aforementioned IP checks, which are in line with e.g. European open data policies.

The decides on preservation of data not submitted to end-point subject area repositories or ARCs in DataPLANT after project end. This will be in line with EU institute policies and data sharing based on EU and international standards.

## **5.5 When is the research data available for use by third parties?**

The data will be published as soon as possible to guarantee reusability. All consortium partners will be encouraged to make data available prior to publication openly and/or under pre-publication agreements such as those started in Fort Lauderdale and set forth by the Toronto International Data Release Workshop.

# **6. Responsibilities and resources**

## **6.1 Who is responsible for adequate handling of the research data (description of roles and responsibilities within the project)?**

The responsible will be Example data officer name as data Officer. The data responsible(s) (data officer) decides on the preservation of data not submitted to end-point subject area repositories or ARCs in DataPLANT after the project end. This will be in line with EU institute policies, and data sharing based on EU and international standards.

## **6.2 Which resources (costs; time or other) are required to implement adequate handling of research data within the project?**

The costs comprise data curation, ARC consistency checks, and maintenance on the Example Project 's side.

Additionally, last-level costs for storage are incurred by end-point repositories (e.g. ENA) but not charged against the Example Project or its members but by the operation budget of these repositories.

A large part of the cost is covered by the Example Project and the structures, tools and knowledge laid down in the DataPLANT consortium.

## **6.3 Who is responsible for curating the data once the project has ended?**

As applicable, Example data officer name , who is responsible for ongoing data maintenance will also take care of it after the finish of the Example Project . DataPLANT as external data archives may provide such services in some cases.

# **7 Annexes**

## **7.1 Abbreviations**

ARC Annotated Research Context

CC Creative Commons

CC CEL Creative Commons Rights Expression Language

DDBJ DNA Data Bank of Japan

DMP Data Management Plan

DoA Description of Action

DOI Digital Object Identifier

EBI European Bioinformatics Institute

ENA European Nucleotide Archive



EU European Union

FAIR Findable Accessible Interoperable Reproducible

GDPR General data protection regulation (of the EU)

IP Intellectual Property

ISO International Organization for Standardization

MIAMET Minimal Information about Metabolite experiment

MIAPPE Minimal Information about Plant Phenotyping Experiment

MinSEQe Minimum Information about a high-throughput Sequencing Experiment

NCBI National Center for Biotechnology Information

NFDI National Research Data Infrastructure (of Germany)

NGS Next Generation Sequencing

RDM Research Data Management

RNASeq RNA Sequencing

SOP Standard Operating Procedures

SRA Short Read Archive

SWATE Swate Workflow Annotation Tool for Excel

ONP Oxford Nanopore

qRTPCR quantitative real time polymerase chain reaction

WP Work Package
