# Supplementary material
Source: MDPI journal article supplement (https://www.mdpi.com/2306-5729/8/11/159)
Supplement: s1 [file s1 › Document S3 Example DataPLAN DMP output of a Horizon Europe project.pdf]

The detailed DMP instructs how data will be handled during and after the project. The Example Project DMP is modified according to the Horizon Europe and Horizon Europe online Manual.

## 1. Data Summary

Will you re-use any existing data and what will you re-use it for? State the reasons if re-use of any existing data has been considered but discarded.

The project builds on existing data sets and relies on them. For instance, without a proper genomic reference it is very difficult to analyze NGS data sets. It is also important to include existing data sets on the expression and metabolic behaviour of Example Topic , but of course, also on existing characterization and the background knowledge. Genomic references can simply be gathered from reference databases for genomes/sequences, like the National Center for Biotechnology Information: NCBI (US); European Bioinformatics Institute: EBI (EU); DNA Data Bank of Japan: DDBJ (JP). Furthermore, prior 'unstructured' data in the form of publications and data contained therein will be used for decision making.

What types and formats of data will the project generate or re-use?

The Example Project will collect and/or generate the following types of raw data: phenotypes, genotypes, other NGS data, metabolome, RNA-Seq and other forms of transcriptomic data, data about Example Topic . In addition, derived data from the original raw data sets will also be collected. This is important, as different analytical pipelines might yield different results or include ad-hoc data analysis parts, and these pipelines will be tracked in the DataPLANT ARC. Therefore, specific care will be taken to document and archive these resources (including the analytic pipelines) as well relying on the vast expertise in the DataPLANT consortium.

What is the purpose of the data generation or re-use and its relation to the objectives of the project?

The Example Project has the following aim: Example Aim . Therefore, data collection, integration and visualization using the DataPLANT ARC structure are absolutely necessary because the data are used not only to understand principles, but also be informed about the provenance of data analyzing data. Stakeholders must also be informed about the provenance of data. It is therefore necessary to ensure that the data are well generated and also well annotated with metadata using open standards, as laid out in the next section.

What is the expected size of the data that you intend to generate or re-use?

We expect to generate raw data in the range of ??? GB of data. The size of the derived data will be about ??? GB.

What is the origin/provenance of the data, either generated or re-used?

Public data will be extracted as described in the previous paragraph. For the Example Project , specific data sets will be generated by the consortium partners.

Data of different types or representing different domains will be generated using unique approaches. For example:

- RNA sequencing will be generated using short-read or long-read platforms, either in house or outsourced to academic facilities or commercial services, and the raw data will be processed using established bioinformatics pipelines.
- Metabolomic data will be generated by coupled chromatography and mass spectrometry using targeted or untargeted approaches.
- Proteomic data will be generated using coupled chromatography and mass spectrometry for the analysis of protein abundance and protein identification, as well as additional techniques for structural analysis, the identification of post-translational modifications and the characterization of protein interactions.
- Image data will be generated by equipment such as cameras, scanners, and microscopes combined with software. Original images which contain metadata such as EXIF photo information will be archived.
- Genomic data will be created from sequencing data, which will be processed to identify genes, regulatory elements, transposable elements, and physical markers such as SNPs, microsatellites and structural variants.
- Genetic data will be generated targeting crosses and breeding experiments, and will include recombination frequencies and crossover events that position genetic markers and quantitative trait loci that can be associated with physical genomic markers/variants.
- Targeted assays data (e.g. glucose and fructose concentrations or production/utilization rates) will be generated using specific equipment and methods that are fully documented in the laboratory notebook.
- Model data will be generated by using software simulations. The complete workflow, which includes the environment, runtime, parameters, and results, will be documented and archived.
- Computer code will be produced by programmers.
- The origin and assembly of cloned DNA will include (a) source of original vector sequence with Add gene reference where available, and source of insert DNA (e.g., amplification by PCR from a given sample, or obtained from existing library), (b) cloning strategy (e.g., restriction endonuclease digests/ligation, PCR, TOPO cloning, Gibson assembly, LR recombination), and (c) verified DNA data sequence of final recombinant vector.
- Phenotypic data will be generated using phenotyping platforms and corresponding ontologies, including number/size of organs such as leaves, flowers, buds etc., size of whole plant, stem/root architecture (number of lateral branches/roots etc), organ structures/morphologies, quantitative metrics such as color, turgor, health/nutrition indicators, among others.

To whom might it be useful ('data utility'), outside your project?

The data will initially benefit the Example Project partners, but will also be made available to selected stakeholders closely involved in the project, and then the scientific community working on Example Topic. Industry, politicians and students can also use the data for different purposes. In addition, the general public interested in Example Topic can also use the data after publication. The data will be disseminated according to the Example Project's dissemination and communication plan, which aligns with DataPLANT platform or other means.

Industry, politicians and students can also use the data for different purposes.

## **2 FAIR data**

### **2.1. Making data findable, including provisions for metadata**

Will data be identified by a persistent identifier?

All data sets will receive unique identifiers, and they will be annotated with metadata.

Will rich metadata be provided to allow discovery? What metadata will be created? What disciplinary or general standards will be followed? In case metadata standards do not exist in your discipline, please outline what type of metadata will be created and how.

The Example Project will rely on community standards plus additional recommendations necessary in plant science adapted by e.g. using suggestions from the Minimum Information About a Plant Phenotyping Experiment (MIAPPE). These unlike cross-domain minimal sets such as Dublin core, which mostly defines the submitter and what general type of data is being dealt with (e.g. images), allow reusability by other researchers as it also defines properties of the plant (see the preceding section). However, of course minimal cross-domain annotations are part of the Example Project. The core integration with DataPLANT will also allow one to tag individual releases with a Digital Object Identifier (DOI). Other standards are also adhered to.

Will search keywords be provided in the metadata to optimize the possibility for discovery and then potential re-use?

Keywords about the experiment and the general consortium will be included, as well as an abstract about the data, where useful. In addition, certain keywords can be auto-generated from dense metadata and its underlying ontologies. Here, DataPLANT strives to complement these with standardized DataPLANT ontologies that are supplemented where the ontology does not yet include the variables.

Will metadata be offered in such a way that it can be harvested and indexed?

To maintain data integrity and to be able to re-analyze data, data sets will get version numbers where this is useful (e.g. raw data must not be changed and will not get a version number and is considered immutable). This is automatically supported by the ARC Git DataPLANT infrastructure. Data variables will be allocated standard names. For example, genes, proteins and metabolites will be named according to approved nomenclature and conventions. These will also be linked to functional ontologies where possible. Datasets will also be named in a meaningful way to ensure readability by humans. Plant names will include traditional names, binomials, and all strain/cultivar/subspecies/variety identifiers.

### **2.2. Making data accessible**

Repository

Will the data be deposited in a trusted repository?

Specialized repositories will be used where appropriate, such as INSDC (GenBank, EBI, DDBJ) for nucleotide sequence data, PIR/UniProt/SWISS-PROT for proteins, PDB for protein structures, GEO for transcriptomics, PRIDE for proteomics data, and METLIN for metabolomics data. For unstructured and less standardized data (e.g., experimental phenotypic measurements), these will be annotated with metadata and if complete allocated a digital object identifier (DOI). Whole datasets will also be wrapped into an ARC with allocated DOIs. The ARC and the converters provided by DataPLANT will ensure that the upload into the endpoint repositories is fast and easy.

Have you explored appropriate arrangements with the identified repository where your data will be deposited?

The submission is for free, and it is the goal (at least of ENA) to obtain as much data as possible. Therefore, arrangements are neither necessary nor useful. Catch-all repositories are not required. For DataPLANT, this has been agreed upon.

Does the repository ensure that the data is assigned an identifier? Will the repository resolve the identifier to a digital object?

As noted above, specialized repositories like SRA /ENA, Pride /Proteomexchange are the most common ones and will be used when appropriate. In the case of unstructured less standardized data (e.g. experimental phenotypic measurements), these will be metadata annotated and if complete given a digital object identifier (DOI). and the whole data sets wrapped into an ARC will get DOIs as well.

Data:

Will all data be made openly available? If certain datasets cannot be shared (or need to be shared under restricted access conditions), explain why, clearly separating legal and contractual reasons from intentional restrictions. Note that in multi-beneficiary projects it is also possible for specific beneficiaries to keep their data closed if opening their data goes against their legitimate interests or other constraints as per the Grant Agreement.

By default, all data sets from the Example Project will be shared with the community and made openly available. However, before the data are released, all will be provided with an opportunity to check for potential IP (according to the consortium agreement and background IP rights). IP protection will be prioritized for datasets that offer the potential for exploitation.

Note that in multi-beneficiary projects it is also possible for specific beneficiaries to keep their data closed if relevant provisions are made in the consortium agreement and are in line with the reasons for opting out.

If an embargo is applied to give time to publish or seek protection of the intellectual property (e.g. patents), specify why and how long this will apply, bearing in mind that research data should be made available as soon as possible.

The data will be published as soon as possible to guarantee reusability. All consortium partners will be encouraged to make data available before publication, openly and/or under pre-publication agreements such as those started in Fort Lauderdale and set forth by the

Toronto International Data Release Workshop. This will be implemented as soon as IP-related checks are complete.

Will the data be accessible through a free and standardized access protocol?

DataPLANT stores data in the ARC, which is a git repo. The DataHUB shares data and metadata as a gitlab instance. The "Git" and "Web" protocol are opensourced and freely accessible. In addition, Zenodo and the endpoint repositories will also be used for access. In General, web-based protocols are free and standardized for access.

If there are restrictions on use, how will access be provided to the data, both during and after the end of the project?

There are no restrictions, beyond the aforementioned IP checks, which are in line with e.g. European open data policies.

How will the identity of the person accessing the data be ascertained?

In case data is only shared within the consortium, if the data is not yet finished or under IP checks, the data is hosted internally and username and password will be required (see also our GDPR rules). In the case data is made public under final EU or US repositories, completely anonymous access is normally allowed. This is the case for ENA as well and both are in line with GDPR requirements. Currently, data management relies on the annotated research context ARC. It is password protected, so before any data can be obtained or samples generated an authentication needs to take place.

Is there a need for a data access committee (e.g. to evaluate/approve access requests to personal/sensitive data)?

Consequently, there is no need for a committee.

Metadata:

Will metadata be made openly available and licenced under a public domain dedication CC0, as per the Grant Agreement? If not, please clarify why. Will metadata contain information to enable the user to access the data?

Yes, where possible, e.g. CC REL will be used for data not submitted to specialized repositories such as ENA.

How long will the data remain available and findable? Will metadata be guaranteed to remain available after data is no longer available?

The data will be made available for many years and ideally indefinitely after the end of the project. In any case data submitted to repositories (as detailed above) e.g. ENA /PRIDE would be subject to local data storage regulation.

Will documentation or reference about any software be needed to access or read the data be included? Will it be possible to include the relevant software (e.g. in open source code)?

No specialized software will be needed to access the data, usually just a modern browser. Access will be possible through web interfaces. For data processing after obtaining raw data, typical open-source software can be used. DataPLANT offers tools such as the open-source SWATE plugin for Excel, the ARC commander, and the DMP tool which will not necessarily make the interaction with data more convenient. However, DataPLANT resources are well described, and their setup is documented on their github project pages. As stated above, here we use publicly available open-source and well-documented certified software

### **2.3. Making data interoperable**

What data and metadata vocabularies, standards, formats or methodologies will you follow to make your data interoperable to allow data exchange and re-use within and across disciplines? Will you follow community-endorsed interoperability best practices? Which ones?

As noted above, we foresee using minimal standards such as MinSEQe for sequencing data and Metabolights compatible forms for metabolites and MIAPPE for phenotyping-like data . The minimal information standards will allow the integration of data across projects, and its reuse according to established and tested protocols. Specialized repositories will be used for common data types. For unstructured and less standardized data (e.g., experimental phenotypic measurements), these will be annotated with metadata and if complete allocated a digital object identifier (DOI). The Whole datasets will also be wrapped into an ARC with allocated DOIs.. Whenever possible, data will be stored in common and openly defined formats including all the necessary metadata to interpret and analyze data in a biological context. By default, no proprietary formats will be used. However Microsoft Excel files (according to ISO/IEC 29500-1:2016) might be used as intermediates by the consortium and by some ARC components. In addition, text files might be edited in text processor files, but will be shared as pdf. Open ontologies will be used where they are mature. As stated above, some ontologies and controlled vocabularies might need to be extended. Here, the Example Project will build on the advanced ontologies developed in DataPLANT.

In case it is unavoidable that you use uncommon or generate project specific ontologies or vocabularies, will you provide mappings to more commonly used ontologies? Will you openly publish the generated ontologies or vocabularies to allow reusing, refining or extending them?

Common and open ontologies will be used. In fact, open biomedical ontologies will be used where they are mature. As stated in the previous question, sometimes ontologies and controlled vocabularies might have to be extended. Here, the Example Project will build on the DataPLANT biology ontology (DPBO) developed in DataPLANT. . Ontology databases such as OBO Foundry will be used to publish ontology. The DPBO is also published in GitHub [https://github.com/nfdi4plants/nfdi4plants\\_ontology](https://github.com/nfdi4plants/nfdi4plants_ontology) .

Will your data include qualified references to other data (e.g. other data from your project, or datasets from previous research)?

The references to other data will be made in the form of DOI and ontology terms.

### **2.4. Increase data re-use**

How will you provide documentation needed to validate data analysis and facilitate data re-use (e.g. readme files with information on methodology, codebooks, data cleaning, analyses, variable definitions, units of measurement, etc.)?

The documentation will be provided in the form of ISA (Investigation Study Assay) and CWL (Common Workflow Language). Here, the Example Project will build on the ARC container, which includes all the data, metadata, and documentations.

Will your data be made freely available in the public domain to permit the widest re-use possible? Will your data be licensed using standard reuse licenses, in line with the obligations set out in the Grant Agreement?

Yes, our data will be made freely available in the public domain to permit the widest re-use possible. Open licenses, such as Creative Commons (CC), will be used whenever possible.

Will the data produced in the project be useable by third parties, in particular after the end of the project?

There will be no restrictions once the data is made public.

Will the provenance of the data be thoroughly documented using the appropriate standards? Describe all relevant data quality assurance processes.

The Example Project has the following aim: Example Aim . Therefore, data collection, integration and visualization using the DataPLANT ARC structure are absolutely necessary because the data are used not only to understand principles, but also be informed about the provenance of data analyzing data. Stakeholders must also be informed about the provenance of data. It is therefore necessary to ensure that the data are well generated and also well annotated with metadata using open standards, as laid out in the next section.

Describe all relevant data quality assurance processes. Further to the FAIR principles, DMPs should also address research outputs other than data, and should carefully consider aspects related to the allocation of resources, data security and ethical aspects.

The data will be checked and curated by using data collection protocol, personnel training, data cleaning, data analysis, and quality control Furthermore, data will be analyzed for quality control (QC) problems using automatic procedures as well as by manual curation . Document all data quality assurance processes, including the data collection protocol, data cleaning procedures, data analysis techniques, and quality control measures. This documentation should be kept for future reference and should be made available to stakeholders upon request.

### **3 Other research outputs**

In addition to the management of data, beneficiaries should also consider and plan for the management of other research outputs that may be generated or re-used throughout their projects. Such outputs can be either digital (e.g. software, workflows, protocols, models, etc.) or physical (e.g. new materials, antibodies, reagents, samples, etc.).

In the current data management plan, any digital output including but not limited to software, workflows, protocols, models, documents, templates, notebooks are all treated as data. Therefore, all aforementioned digital objects are already described in detail. For the non-digital objects, the data management plan will be closely connected to the digitalisation of the physical objects. Example Project will build a workflow which connects the ARC with an electronic lab notebook in order to also manage the physical objects.

Beneficiaries should consider which of the questions pertaining to FAIR data above, can apply to the management of other research outputs, and should strive to provide sufficient detail on how their research outputs will be managed and shared, or made available for re-use, in line with the FAIR principles.

Open licenses, such as Creative Commons CC, will be used whenever possible even on the other digital objects.

## **4. Allocation of resources**

What will the costs be for making data or other research outputs FAIR in your project (e.g. direct and indirect costs related to storage, archiving, re-use, security, etc.)?

The Example Project will bear the costs of data curation, ARC consistency checks, and data maintenance/security before transfer to public repositories. Subsequent costs are then borne by the operators of these repositories.

Additionally, costs for after publication storage are incurred by end-point repositories (e.g. ENA) but not charged against the Example Project or its members but by the operation budget of these repositories.

How will these be covered? Note that costs related to research data/output management are eligible as part of the Horizon Europe grant (if compliant with the Grant Agreement conditions)

The cost born by the Example Project are covered by the project funding. Pre-existing structures such as structures, tools, and knowledge laid down in the DataPLANT consortium will also be used.

Who will be responsible for data management in your project?

The responsible person will be Example data officer name of the Example Project .

How will long term preservation be ensured? Discuss the necessary resources to accomplish this (costs and potential value, who decides and how, what data will be kept and for how long)?

The data officer will ultimately decides on the strategy to preserve data that are not submitted to end-point subject area repositories or ARCs in DataPLANT when the project ends. This will be in line with EU guidelines, institute policies, and data sharing based on EU and international standards.

## 5. Data security

What provisions are or will be in place for data security (including data recovery as well as secure storage/archiving and transfer of sensitive data)?

Online platforms will be protected by vulnerability scanning, two-factor authorization and daily automatic backups allowing immediate recovery. All partners holding confidential project data to use secure platforms with automatic backups and offsite secure copies. DataHUB and ARCs have been generated in DataPLANT, data security will be imposed. This comprises secure storage, and the use of password and usernames is generally transferred via separate safe media.

Will the data be safely stored in trusted repositories for long term preservation and curation?

Wherever there are certified repositories, these will be used as end-point repositories. Transcriptomics data and gene sequence data will be also made available upon publication via the standards ENA/SRA, metabolite data in e.g. Metabolights (and/or Nationwide repositories like the German NFDI the French INRAe), Proteomics data in e.g. Pride/Proteomexchange . In addition, the national resource will maintain safekeeping of data also after the project ends. In addition, databases like e.g. Proteomexchange do not support deep plant specific metadata; hence ARCs will be maintained to ensure the reusability of plant-specific metadata.

## 6. Ethics

Are there, or could there be, any ethics or legal issues that can have an impact on data sharing? These can also be discussed in the context of the ethics review. If relevant, include references to ethics deliverables and ethics chapter in the Description of the Action (DoA).

At the moment, we do not anticipate ethical or legal issues with data sharing. In terms of ethics, since this is plant data, there is no need for an ethics committee, however, diligence for plant resource benefit sharing is considered (□see Nagoya protocol).

Will informed consent for data sharing and long term preservation be included in questionnaires dealing with personal data?

The only personal data that will potentially be stored is the submitter name and affiliation in the metadata for data. In addition, personal data will be collected for dissemination and communication activities using specific methods and procedures developed by the Example Project partners to adhere to data protection.

## 7. Other issues

Do you, or will you, make use of other national/funder/sectorial/departmental procedures for data management? If yes, which ones (please list and briefly describe them)?

Yes, the Example Project will use common Research Data Management (RDM) tools and in particular resources developed by the NFDI of Germany.

## **3 Annexes**

### **3.1 Abbreviations**

ARC Annotated Research Context

CC Creative Commons

CC CEL Creative Commons Rights Expression Language

DDBJ DNA Data Bank of Japan

DMP Data Management Plan

DoA Description of Action

DOI Digital Object Identifier

EBI European Bioinformatics Institute

ENA European Nucleotide Archive

EU European Union

FAIR Findable Accessible Interoperable Reproducible

GDPR General data protection regulation (of the EU)

IP Intellectual Property

ISO International Organization for Standardization

MIAMET Minimal Information about Metabolite experiment

MIAPPE Minimal Information about Plant Phenotyping Experiment

MinSEQe Minimum Information about a high-throughput Sequencing Experiment

NCBI National Center for Biotechnology Information

NFDI National Research Data Infrastructure (of Germany)

NGS Next Generation Sequencing

RDM Research Data Management

RNASeq RNA Sequencing

SOP Standard Operating Procedures

SRA Short Read Archive

SWATE Swate Workflow Annotation Tool for Excel

ONP Oxford Nanopore

qRTPCR quantitative real time polymerase chain reaction

WP Work Package
